# Supplementary material for: Dimerization and direct membrane interaction of Nup53 contribute to nuclear pore complex assembly
Source: PubMed Central journal article supplement — EMBO J. 2012 Sep 7;31(20):4072–84. doi: 10.1038/emboj.2012.256 (PMC3474928; doi:10.1038/emboj.2012.256), 2012-09-07
Supplement: emboj2012256s1.pdf [file emboj2012256s1.pdf]

## Supplementary Information

### **Dimerization and direct membrane interaction of Nup53 contribute to nuclear pore complex assembly**

Benjamin Vollmer<sup>1</sup>, Allana Schooley<sup>1</sup>, Ruchika Sachdev<sup>1</sup>, Nathalie Eisenhardt<sup>1</sup>,  
Anna Schneider<sup>2</sup>, Cornelia Sieverding<sup>1</sup>, Johannes Madlung<sup>3</sup>, Uwe Gerken<sup>4,5</sup>,  
Boris Macek<sup>3</sup>, Wolfram Antonin<sup>1,6</sup>

<sup>1</sup> Friedrich Miescher Laboratory of the Max Planck Society, Spemannstraße 39,  
72076 Tübingen, Germany

<sup>2</sup> Max Planck Institute for Developmental Biology, Spemannstraße 35, 72076  
Tübingen, Germany

<sup>3</sup> Proteome Center Tübingen, University of Tübingen, 72076 Tübingen,  
Germany

<sup>4</sup> Institute of Microbiology, University of Hohenheim, Garbenstrasse 30, 70599  
Stuttgart, Germany

<sup>5</sup> Present address: Lehrstuhl für Experimentalphysik IV, University of Bayreuth,  
Universitätsstrasse 30, 95447 Bayreuth

<sup>6</sup> author for correspondence: [wolfram.antonin@tuebingen.mpg.de](mailto:wolfram.antonin@tuebingen.mpg.de)

**Supplementary information contains:**

Supplementary Figures S1–S7 & Table S1–S2

Supplementary Methods

Supplementary References

# Supplementary Figure S1

## A

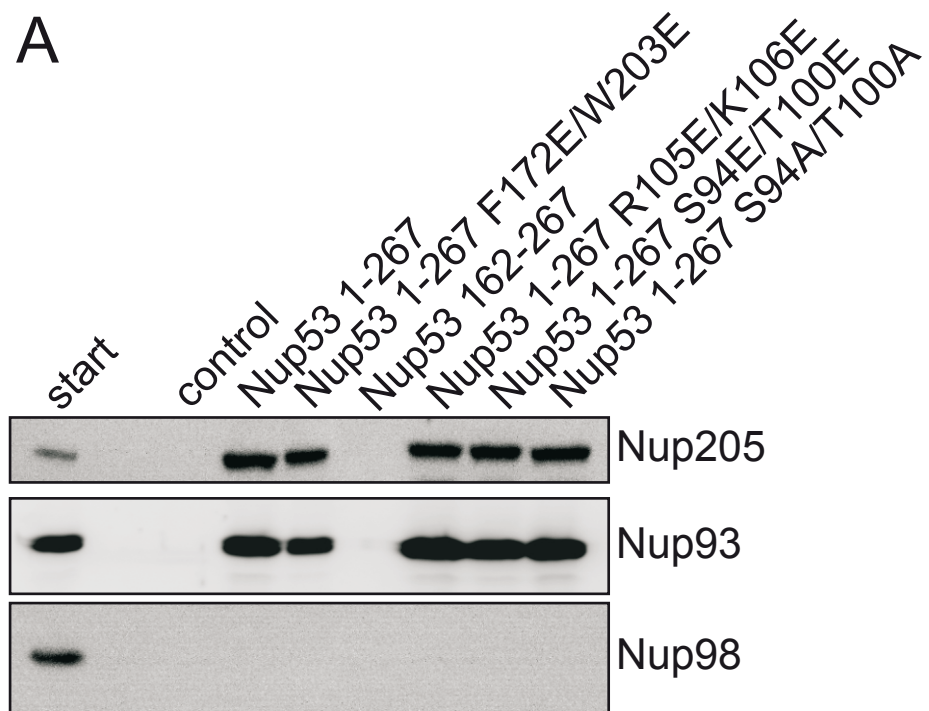

## B

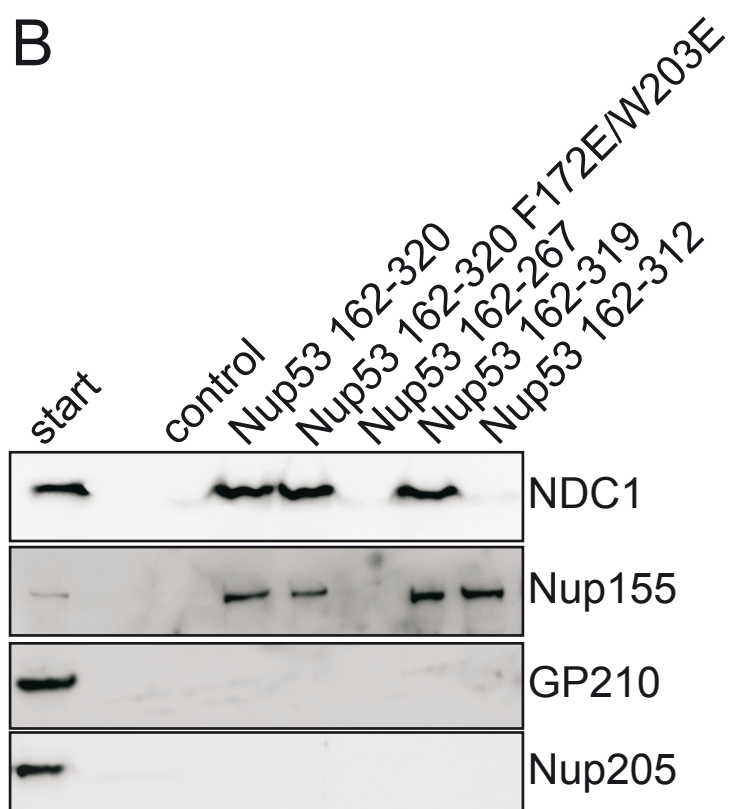

## Figure S1

Nup53 has different binding sites for membrane and protein interaction.

(A) GST fusions of an N-terminal fragment of *Xenopus* Nup53 as well as *Xenopus* Nup98 (aa 487-634) (control) were incubated with cytosol from *Xenopus* egg extracts. Eluates were analyzed by western blotting with antibodies against the nucleoporins Nup205 and Nup93, known to bind this region, as well as Nup98 as a negative control. Please note that introducing amino acid changes causing the monomerization of Nup53 (F172E/W203E) also negatively influenced the interaction with Nup205 and Nup93. In contrast, mutations that inactivate the N-terminal membrane binding region (R105E/K106E and S94E/T100E) as well as the S94A/T100A control mutation did not interfere with Nup205 and Nup93 binding.

(B) GST fusions *Xenopus* Nup98 (aa 487-634) (control), the C-terminal fragment of *Xenopus* Nup53 (162-320), the RRM mutant (F172E/W203E) and C-terminal truncations were incubated with cytosol (for detection of Nup155 and Nup205) or Triton X-100 solubilized membranes (for NDC1 and GP210 detection) from *Xenopus* egg extracts. Eluates were analyzed by western blotting with antibodies against the nucleoporins Nup155 and NDC1, known to bind this region as well as Nup205 and GP210 as negative controls. Please note that mutation of the RRM domain (F172E/W203E) did not influence the interaction with NDC1 but results in a decreased binding to Nup155. The C-terminal truncations weakening the C-terminal membrane binding region (162-319 and 162-312) did not interfere with Nup155 binding and the 162-319 fragment was still able to interact with NDC1.

# Supplementary Figure S2

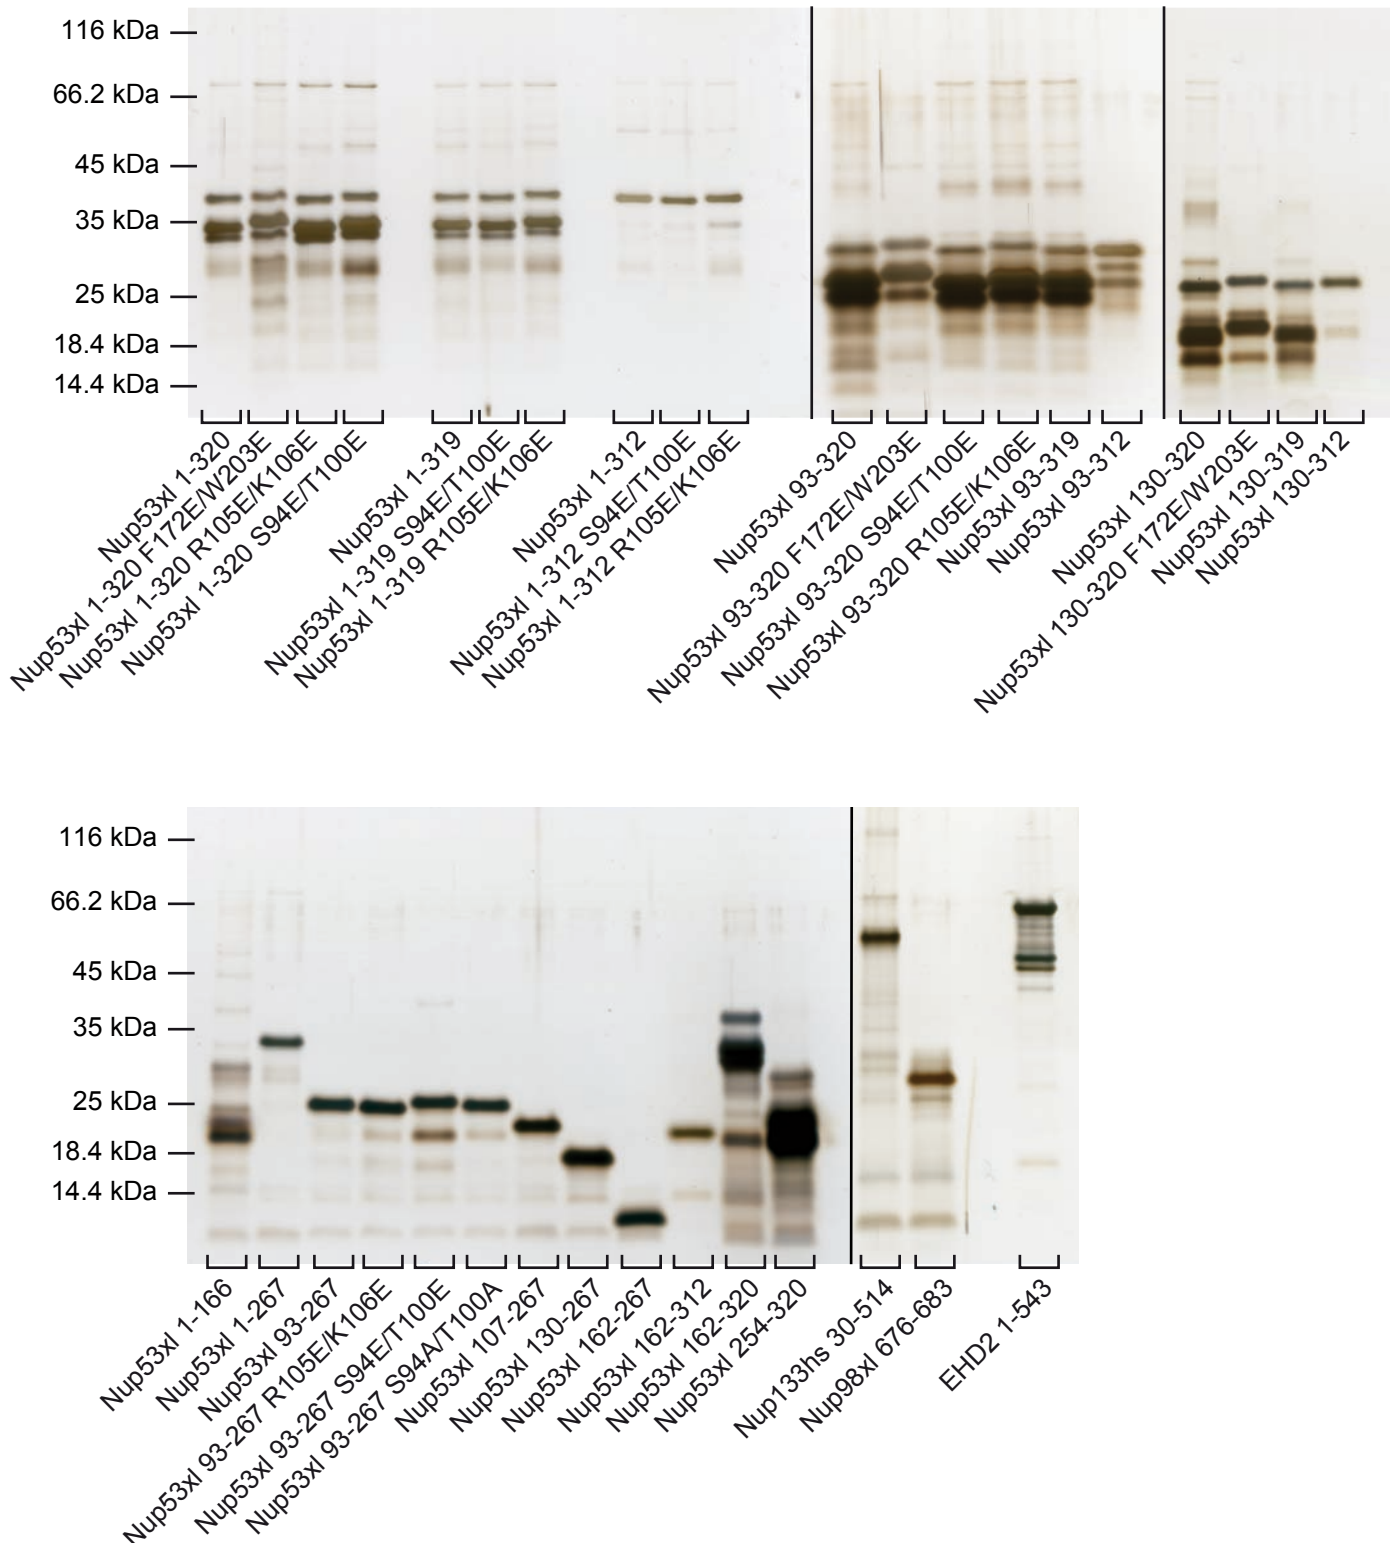

**Figure S2**

Proteins were separated on Tricine-SDS-PAGE Schagger gels (Schagger & von Jagow, 1987) followed by silver staining.

# Supplementary Figure S3

## A

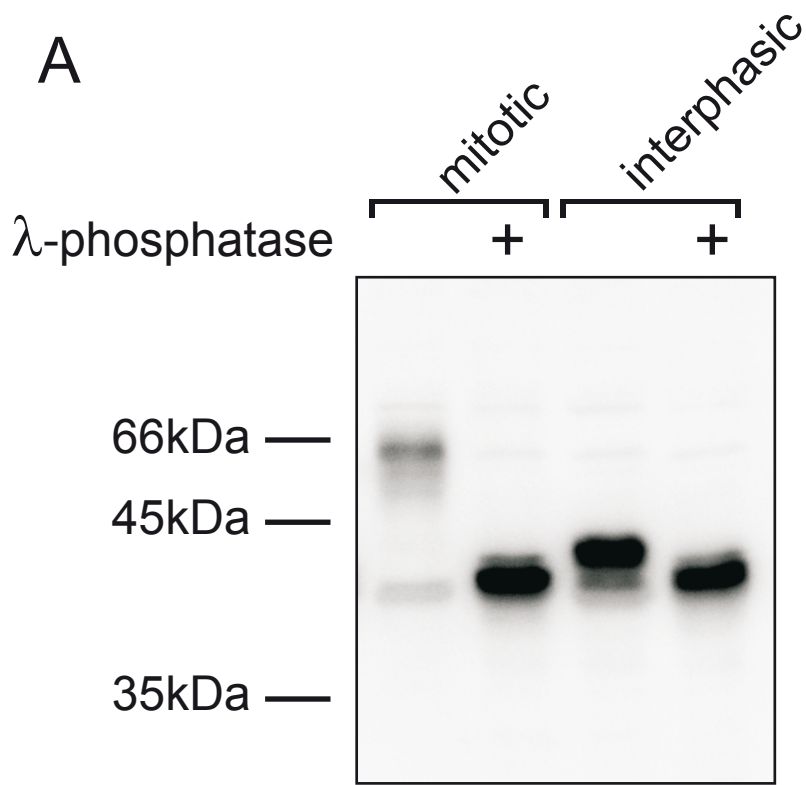

**B**

Protein IDs: gi\_4584796;gi\_148232142;gi\_15987768;gi\_nup53a;gi\_nup53b;gi\_32450351  
 Scannumber: 8537  
 Source: 20101220\_JM\_CO\_0221\_R7\_mitotic\_01  
 Method: CID; ITMS

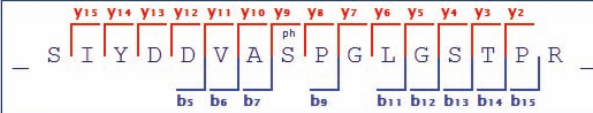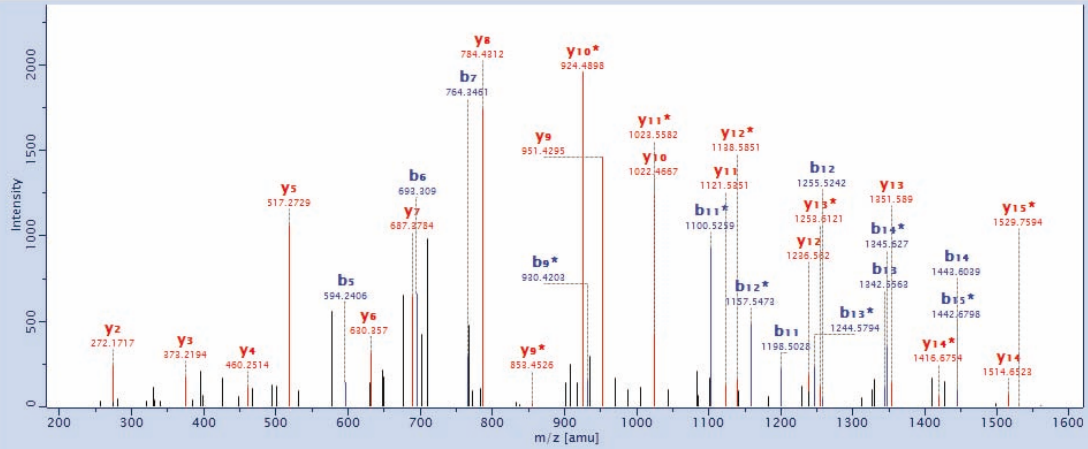**parent information**

Mass: 1713.7611  
 m/z: 857.89  
 Charge: 2+  
 Mass Error [ppm]: 0.030899  
 PTM Score: 250.7  
 PEP: 7.5085E-41  
 Mascot Score: 100.54  
 Intensity: 13664197

**general information**

Annotation: 14 of 16 => 88 %  
 Intensity Coverage: 63 %  
 Protein Localisation: 89 ... 104

| B-ion            |                     | Y-ion |                     |
|------------------|---------------------|-------|---------------------|
| $\Delta$ Da      | mass                | seq   | mass                |
| NaN              | 88.0393049          | 1     | NaN                 |
| NaN              | 201.1233689         | 2     | NaN                 |
| NaN              | 364.1866974         | 3     | 1529.7594479        |
| NaN              | 479.2136404         | 4     | 1416.6753839        |
| <b>0.310625</b>  | <b>594.2405835</b>  | 5     | <b>1253.6120554</b> |
| <b>0.1467521</b> | <b>693.3089974</b>  | 6     | <b>1138.5851123</b> |
| <b>0.0844919</b> | <b>764.3461112</b>  | 7     | <b>1023.5581693</b> |
| NaN              | 931.3444706         | 8     | <b>924.4897554</b>  |
| <b>0.1978867</b> | <b>930.4203384</b>  | 9     | <b>853.4526416</b>  |
| NaN              | 1085.4186981        | 10    | <b>784.4311782</b>  |
| <b>0.1684698</b> | <b>1100.5258661</b> | 11    | <b>687.3784143</b>  |
| <b>0.0851164</b> | <b>1157.5473299</b> | 12    | <b>630.3569506</b>  |
| <b>0.0762814</b> | <b>1244.5793583</b> | 13    | <b>517.2728866</b>  |
| <b>0.1205219</b> | <b>1345.6270367</b> | 14    | <b>460.2514229</b>  |
| <b>0.1888518</b> | <b>1442.6798006</b> | 15    | <b>373.2193945</b>  |
| NaN              | NaN                 | 16    | <b>272.171716</b>   |
| NaN              | NaN                 | R     | 175.1189522         |

Protein IDs: gi\_4584796;gi\_148232142;gi\_15987768;gi\_nup53a;gi\_nup53b;gi\_32450351  
 Scannumber: 8673  
 Source: 20101126\_CO\_JM\_0221WoAn\_RS\_IP\_mitotic\_01  
 Method: CID; ITMS

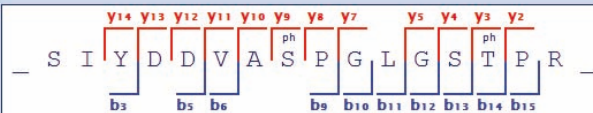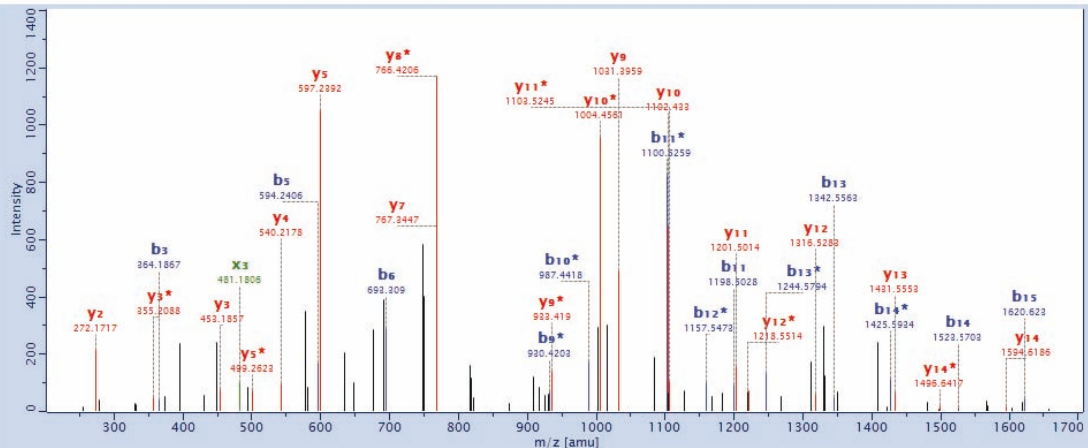**parent information**

Mass: 1793.7274  
 m/z: 897.87  
 Charge: 2+  
 Mass Error [ppm]: 0.13197  
 PTM Score: 238.2  
 PEP: 8.3029E-53  
 Mascot Score: 51.05  
 Intensity: 18521420

**general information**

Annotation: 13 of 16 => 81 %  
 Intensity Coverage: 55 %  
 Protein Localisation: 89 ... 104

| B-ion            |                    | X-ion |                  | Y-ion            |                   |
|------------------|--------------------|-------|------------------|------------------|-------------------|
| $\Delta$ Da      | mass               | seq   | mass             | $\Delta$ Da      | mass              |
| NaN              | 88.0393049         | 1     | NaN              | NaN              | NaN               |
| NaN              | 201.1233689        | 2     | NaN              | NaN              | NaN               |
| <b>0.1353668</b> | <b>364.1866974</b> | 3     | 1733.6819395     | NaN              | 1707.7026749      |
| NaN              | 479.2136404        | 4     | 1620.5978755     | NaN              | <b>1496.64171</b> |
| <b>0.0384082</b> | <b>594.2405835</b> | 5     | 1457.5345469     | NaN              | <b>1431.55528</b> |
| <b>0.0780403</b> | <b>693.3089974</b> | 6     | 1342.5076039     | NaN              | <b>1218.55144</b> |
| NaN              | 764.3461112        | 7     | 1227.4806609     | NaN              | <b>1103.5245</b>  |
| NaN              | 931.3444706        | 8     | 1128.412247      | NaN              | <b>1004.45609</b> |
| <b>0.0214951</b> | <b>930.4203384</b> | 9     | 1057.3751332     | NaN              | <b>933.418973</b> |
| <b>0.2336739</b> | <b>987.441802</b>  | 10    | 890.3767738      | NaN              | <b>766.420613</b> |
| <b>0.0236689</b> | <b>1100.52587</b>  | 11    | 793.3240099      | NaN              | <b>767.344745</b> |
| <b>0.1385832</b> | <b>1157.54733</b>  | 12    | 736.3025462      | NaN              | 710.3232816       |
| <b>0.0184452</b> | <b>1244.57936</b>  | 13    | 623.2184822      | NaN              | <b>499.262322</b> |
| <b>0.0542153</b> | <b>1425.59337</b>  | 14    | 566.1970185      | NaN              | <b>540.217754</b> |
| <b>0.0871775</b> | <b>1620.62303</b>  | 15    | <b>481.18064</b> | <b>0.1698237</b> | <b>355.20883</b>  |
| NaN              | NaN                | 16    | 298.1509806      | NaN              | <b>272.171716</b> |
| NaN              | NaN                | R     | 201.0982167      | NaN              | 175.1189522       |



Protein IDs: gi\_4584796;gi\_148232142;gi\_15987768;gi\_nup53a;gi\_nup53b  
 Scannumber: 5067  
 Source: 20101126\_COJM\_0221WoAn\_RS\_IP\_mitotic\_01  
 Method: CID; ITMS

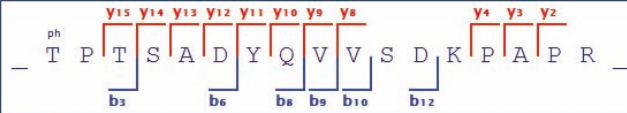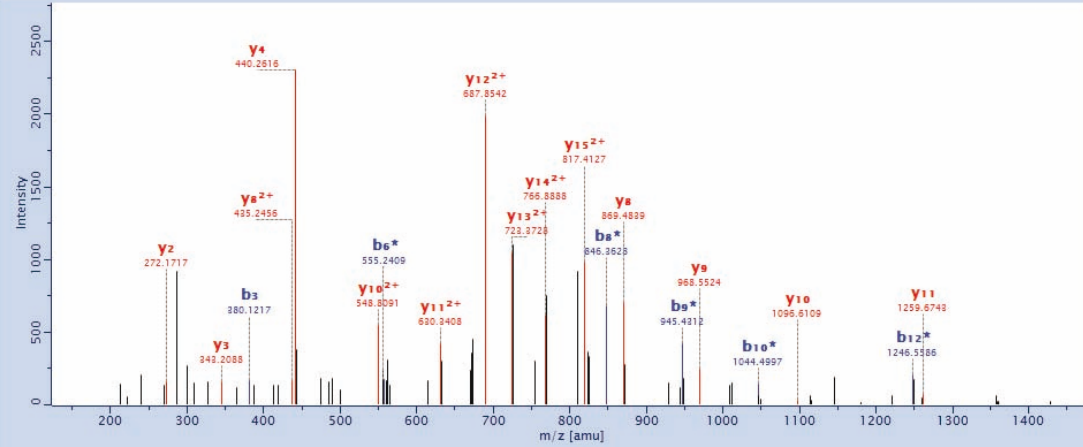

parent information

Mass: 1910.8775  
 m/z: 638.3  
 Charge: 3+  
 Mass Error [ppm]: 0.1223  
 PTM Score: 110.8  
 PEP: 5.3158E-06  
 Mascot Score: 37.4  
 Intensity: 1839497.9

general information

Annotation: 12 of 17 => 71 %  
 Intensity Coverage: 49 %  
 Protein Localisation: 288 ... 304

| B- <i>ion</i>    |                   | seq |   | Y- <i>ion</i> |                   | Y- <i>ion</i> <sup>2+</sup> |                   |                  |
|------------------|-------------------|-----|---|---------------|-------------------|-----------------------------|-------------------|------------------|
| $\Delta$ Da      | mass              |     |   | mass          | $\Delta$ Da       | mass                        | $\Delta$ Da       |                  |
| NaN              | 182.0212859       | 1   | T | NaN           | NaN               | NaN                         | NaN               |                  |
| NaN              | 279.0740498       | 2   | P | 1730.8707896  | NaN               | 1730.8707896                | NaN               |                  |
| <b>0.0860354</b> | <b>380.121728</b> | 3   | T | 1633.8180257  | NaN               | <b>817.412651</b>           | <b>0.3084793</b>  |                  |
| NaN              | 467.1537567       | 4   | S | 1532.7703472  | NaN               | <b>766.888812</b>           | <b>0.0390804</b>  |                  |
| NaN              | 538.1908705       | 5   | A | 1445.7383188  | NaN               | <b>723.372798</b>           | <b>0.0150096</b>  |                  |
| <b>0.1898076</b> | <b>555.240917</b> | 6   | D | 1374.701205   | NaN               | <b>687.854241</b>           | <b>0.315559</b>   |                  |
| NaN              | 816.281142        | 7   | Y | 11            | <b>1259.67426</b> | <b>0.1249323</b>            | <b>630.340769</b> | <b>0.0778099</b> |
| <b>0.1566467</b> | <b>846.362824</b> | 8   | Q | 10            | <b>1096.61093</b> | <b>0.0732137</b>            | <b>548.809105</b> | <b>0.0020371</b> |
| <b>0.0182254</b> | <b>945.431237</b> | 9   | V | 9             | <b>968.552356</b> | <b>0.1522949</b>            | 968.552356        | NaN              |
| <b>0.1110664</b> | <b>1044.49965</b> | 10  | V | 8             | <b>869.483942</b> | <b>0.0255184</b>            | <b>435.245609</b> | <b>0.0565758</b> |
| NaN              | 1229.5085758      | 11  | S | 7             | 770.4155281       | NaN                         | 770.4155281       | NaN              |
| <b>0.2735886</b> | <b>1246.55862</b> | 12  | D | 6             | 683.3834997       | NaN                         | 683.3834997       | NaN              |
| NaN              | 1472.6304818      | 13  | K | 5             | 568.3565567       | NaN                         | 568.3565567       | NaN              |
| NaN              | 1569.6832457      | 14  | P | 4             | <b>440.261594</b> | <b>0.0740997</b>            | 440.2615937       | NaN              |
| NaN              | 1640.7203595      | 15  | A | 3             | <b>343.20883</b>  | <b>0.0171794</b>            | 343.2088298       | NaN              |
| NaN              | 1737.7731233      | 16  | P | 2             | <b>272.171716</b> | <b>0.1399295</b>            | 272.171716        | NaN              |
| NaN              | NaN               | 17  | R | 1             | 175.1189522       | NaN                         | 175.1189522       | NaN              |

Protein IDs: gi\_4584796;gi\_148232142;gi\_15987768;gi\_nup53a;gi\_nup53b  
 Scannumber: 5827  
 Source: 20101126\_COJM\_0221WoAn\_RS\_IP\_mitotic\_01  
 Method: CID; ITMS

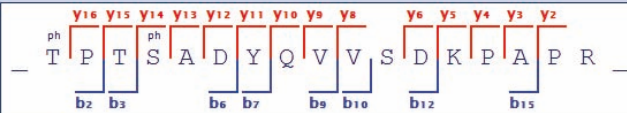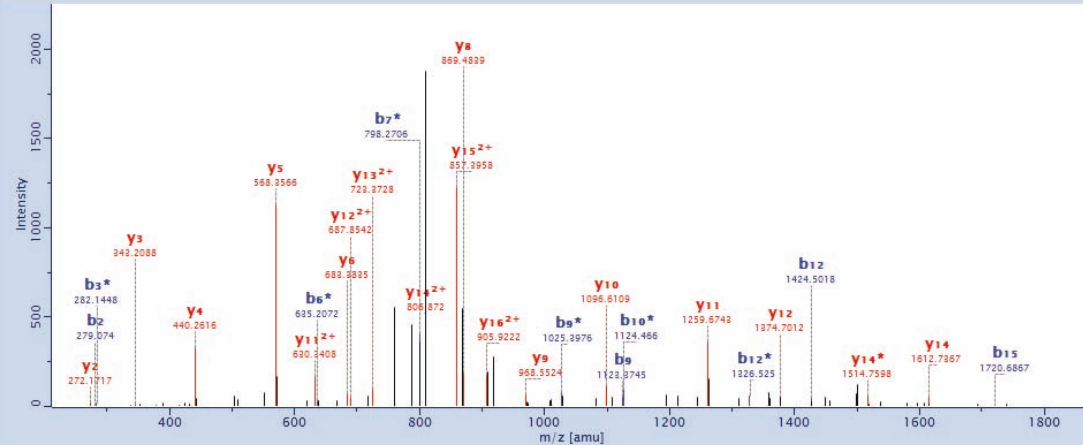

parent information

Mass: 1990.8439  
 m/z: 996.93  
 Charge: 2+  
 Mass Error [ppm]: 0.12316  
 PTM Score: 173.19  
 PEP: 3.1561E-23  
 Mascot Score: 52.53  
 Intensity: 723052.1

general information

Annotation: 14 of 17 => 82 %  
 Intensity Coverage: 46 %  
 Protein Localisation: 288 ... 304

| B- <i>ion</i>    |                   | seq |   | Y- <i>ion</i> |                   | Y- <i>ion</i> <sup>2+</sup> |                   |                  |
|------------------|-------------------|-----|---|---------------|-------------------|-----------------------------|-------------------|------------------|
| $\Delta$ Da      | mass              |     |   | mass          | $\Delta$ Da       | mass                        | $\Delta$ Da       |                  |
| NaN              | 182.0212859       | 1   | T | NaN           | NaN               | NaN                         | NaN               |                  |
| <b>0.280595</b>  | <b>279.07405</b>  | 2   | P | 1810.8371206  | NaN               | <b>905.922199</b>           | <b>0.03349</b>    |                  |
| <b>0.2120625</b> | <b>282.144832</b> | 3   | T | 1713.7843567  | NaN               | <b>857.395817</b>           | <b>0.1478846</b>  |                  |
| NaN              | 547.1200877       | 4   | S | 14            | <b>1514.75978</b> | <b>0.204207</b>             | <b>806.871977</b> | <b>0.2981887</b> |
| NaN              | 618.1572015       | 5   | A | 13            | 1445.7383188      | NaN                         | <b>723.372798</b> | <b>0.4335988</b> |
| <b>0.0729639</b> | <b>635.207248</b> | 6   | D | 12            | <b>1374.70121</b> | <b>0.0788243</b>            | <b>687.854241</b> | <b>0.1524731</b> |
| <b>0.03962</b>   | <b>798.270577</b> | 7   | Y | 11            | <b>1259.67426</b> | <b>0.0252142</b>            | <b>630.340769</b> | <b>0.1820579</b> |
| NaN              | 1024.3060505      | 8   | Q | 10            | <b>1096.61093</b> | <b>0.1455363</b>            | 1096.6109335      | NaN              |
| <b>0.0783546</b> | <b>1025.39757</b> | 9   | V | 9             | <b>968.552356</b> | <b>0.0307739</b>            | 968.552356        | NaN              |
| <b>0.1582852</b> | <b>1124.46598</b> | 10  | V | 8             | <b>869.483942</b> | <b>0.1000423</b>            | 869.483942        | NaN              |
| NaN              | 1309.4749068      | 11  | S | 7             | 770.4155281       | NaN                         | 770.4155281       | NaN              |
| <b>0.0591335</b> | <b>1326.52495</b> | 12  | D | 6             | <b>683.3835</b>   | <b>0.0513464</b>            | 683.3834997       | NaN              |
| NaN              | 1552.5968128      | 13  | K | 5             | <b>568.356557</b> | <b>0.0124619</b>            | 568.3565567       | NaN              |
| NaN              | 1649.6495767      | 14  | P | 4             | <b>440.261594</b> | <b>0.0915863</b>            | 440.2615937       | NaN              |
| <b>0.2862099</b> | <b>1720.68669</b> | 15  | A | 3             | <b>343.20883</b>  | <b>0.1309529</b>            | 343.2088298       | NaN              |
| NaN              | 1817.7394543      | 16  | P | 2             | <b>272.171716</b> | <b>0.0334842</b>            | 272.171716        | NaN              |
| NaN              | NaN               | 17  | R | 1             | 175.1189522       | NaN                         | 175.1189522       | NaN              |



### **Figure S3**

(A) Nup53 is phosphorylated in interphase and mitosis

4  $\mu$ l of mitotic (CSF arrested) or interphasic *Xenopus* egg extracts were diluted in 100  $\mu$ l of phosphatase buffer (NEB) and incubated where indicated with 400 U  $\lambda$ -phosphatase for 30 min at 30°C. Samples were analyzed by 12% SDS-PAGE and Western blotting using the *Xenopus* Nup53 antibody. Please note the different shifting of mitotic and interphasic Nup53 after phosphatase treatment indicating that Nup53 is a phosphoprotein throughout the cell cycle but hyperphosphorylated during mitosis.

(B) Fragmentation mass spectra of *Xenopus* Nup53 peptides carrying mitotic specific phosphorylations

# Supplementary Figure S4

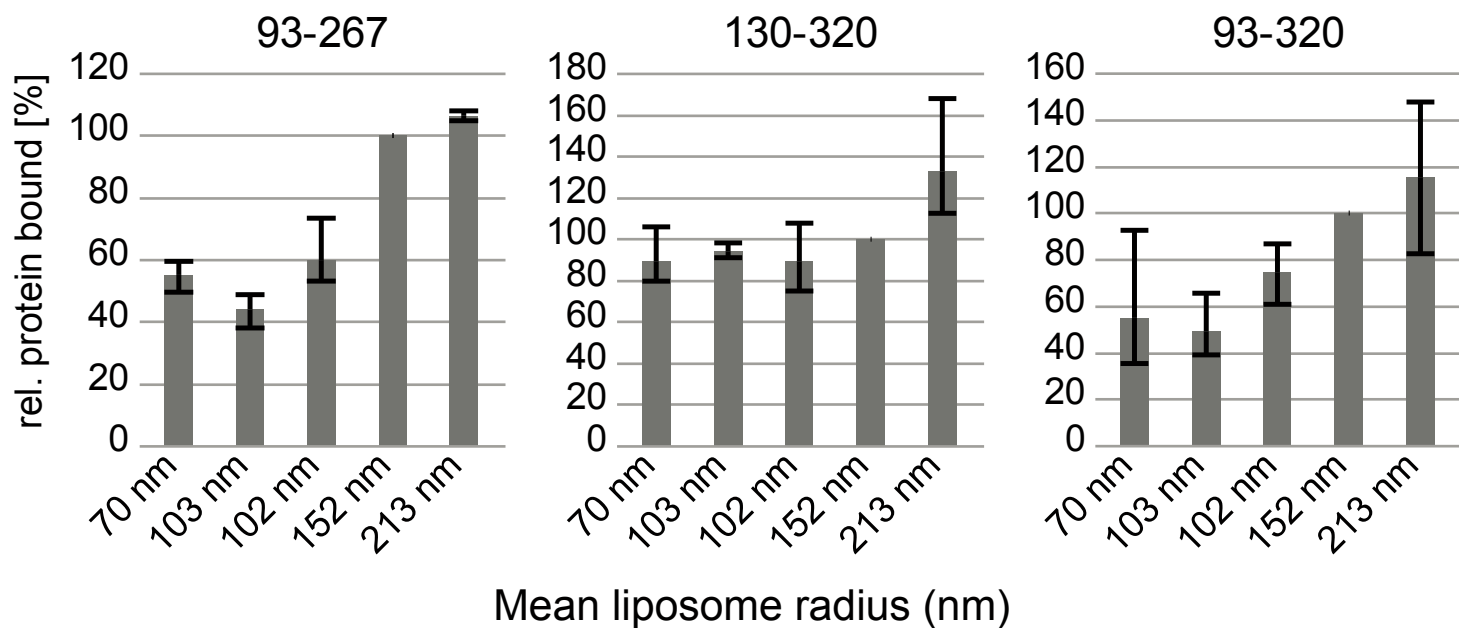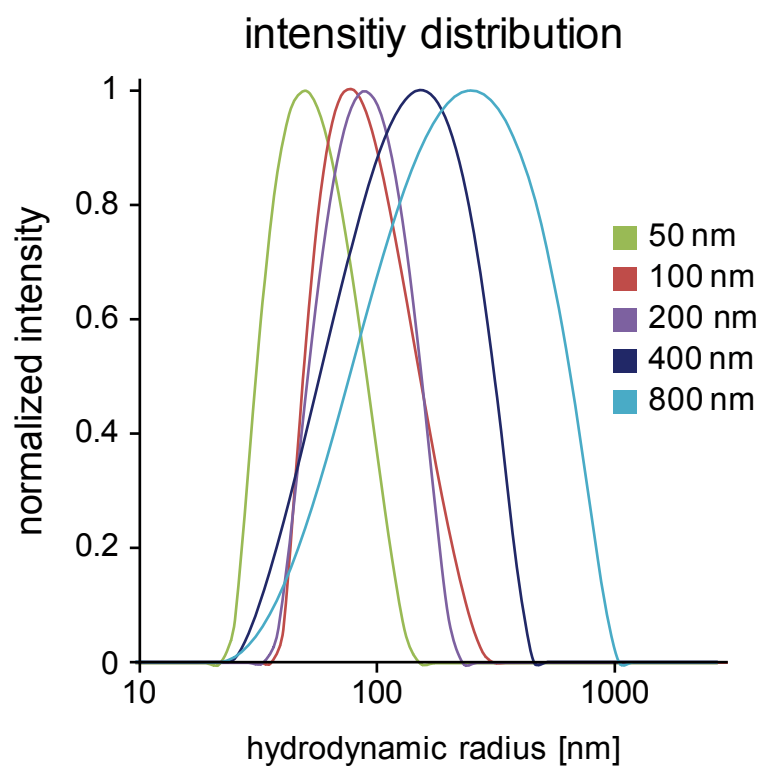

#### **Figure S4**

The two Nup53 membrane binding regions show different sensitivity to membrane curvature. Fragments comprising the N-terminal (93-267), C-terminal (130-320) or both (93-320) membrane binding sites, respectively, including the RRM domains were incubated with differently sized liposomes as indicated by the determined mean radii. Liposome binding was quantified as in Figure 2C. Whereas fragments which include the N-terminal membrane binding site (93-267 and 93-320) showed a significantly reduced binding to smaller liposome diameters and thus to higher membrane curvature this effect was not seen for the C-terminal membrane binding site (130-320). The averages of three independent experiments, normalized to the binding of the respective fragments to 150 nm liposomes, are shown. Error bars represent the range. Liposome radii were determined by light scattering after extrusion through membranes of different pore size as indicated for the different measurements. The lower panel shows one exemplary measurement done to determine the average radius of the respective preparation. Please note the rather similar average radii of liposomes prepared using 100 nm and 200 nm membranes.

## Supplementary Figure S5

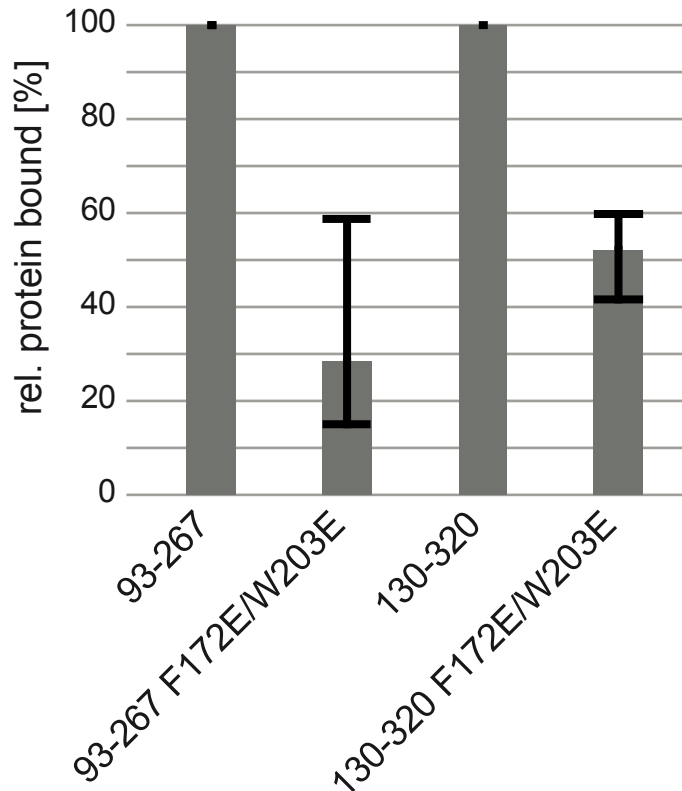

**Figure S5**

Both Nup53 membrane binding regions require dimerization by the RRM domain.

Nup53 fragments containing the first (93-267) or second (130-320) membrane binding region including the RRM domain were quantitatively assayed for liposome binding as in Figure 2C.

Whereas fragments containing the wild type RRM domain bound to liposomes, introduction of two amino acid changes (F172E/W203E), which render the RRM domain incapable of dimerization, reduced liposome binding for both fragments. The averages of three independent experiments, normalized to liposome binding of the wild type protein, are shown.

Error bars represent the range.

## Supplementary Figure S6

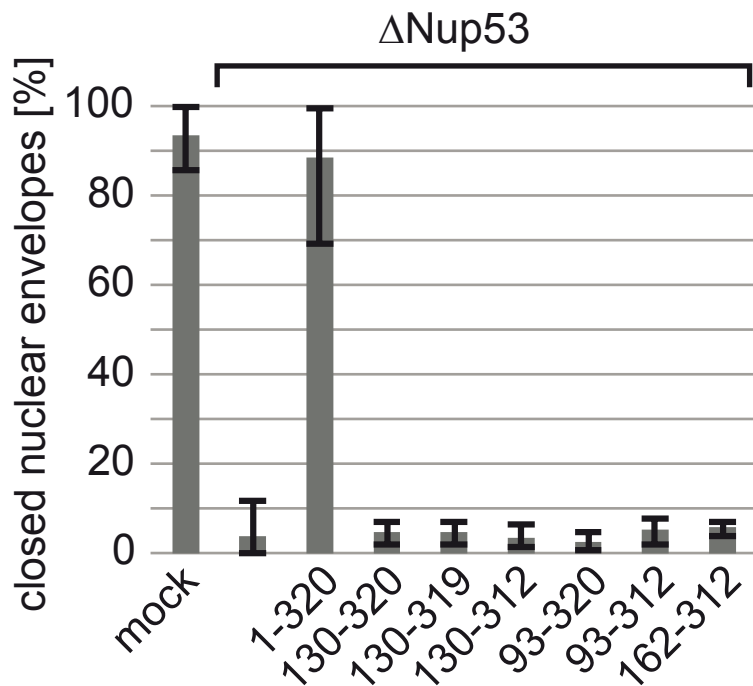

**Figure S6**

The interaction of Nup53 to Nup93 is necessary for nuclear envelope formation.

Nuclei were assembled in mock, Nup53 depleted extracts or Nup53 depleted extracts supplemented with wild type protein (1-320) or various fragments of Nup53 for 120 min, fixed with 2% PFA and 0.5% glutaraldehyde and analyzed for chromatin and membrane staining. Shown is the quantitation of chromatin substrates with a closed nuclear envelope as done in Figure 2F. Please note that all fragments lacking the N-terminal region of Nup53 necessary for Nup93 interaction (Figure S1A) and especially fragment 162-312 which has the ability to interact with Nup155 (Figure S1B) did not support nuclear envelope formation.

# Supplementary Figure S7

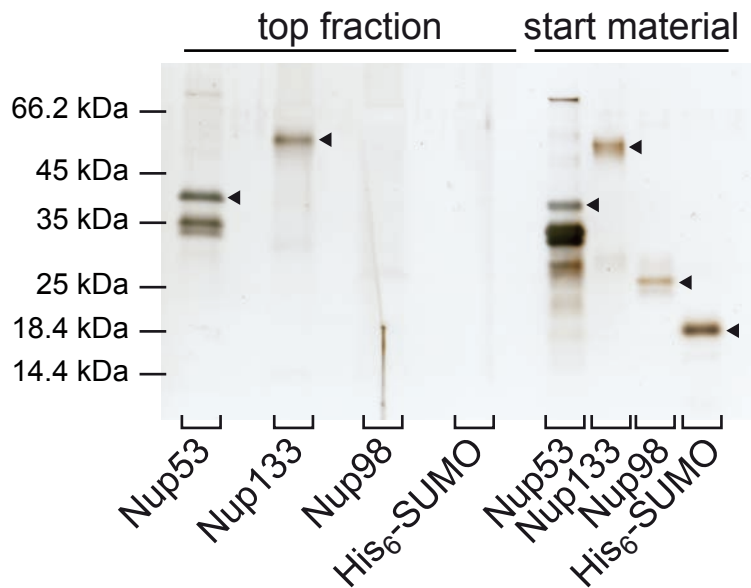

**Figure S7**

Recombinant Nup53 binds to liposomes mimicking the ER / nuclear envelope lipid composition

3  $\mu$ M recombinant *Xenopus* Nup53 (Nup53) a fragment of Nup133 (aa 67-514) as positive control and Nup98 (aa 676-863) and His<sub>6</sub>-tagged SUMO as negative controls, were incubated with 6 mg/ml fluorescently labeled liposomes prepared from a lipid mixture mimicking the ER/nuclear envelope lipid composition (see materials and methods). Flotation was done as described in Figure 1A.



**Table S1: Peptides and phosphorylation sites identified in Xenopus Nup53 by mass spectrometric analysis**

| <b>phosphopeptide</b>                               | <b>amino acid</b> |
|-----------------------------------------------------|-------------------|
| PSAGAQFLPGFLLGDIPTPV <b>T</b> PQPR                  | T46               |
| <b>S</b> PLH <b>S</b> GG <b>S</b> PPQPVLPTHK        | S60, S64, S67     |
| SPLHSGG <b>S</b> PPQPVLPTHK                         | S67               |
| SIYDDVA <b>S</b> PGLGSTPR                           | S94               |
| SIYDDVA <b>S</b> PGLG <b>S</b> T <b>P</b> R         | S94, T100         |
| MASFVSLHTPLSGAIP <b>S</b> PAVFSPATIGQSR             | S124              |
| MASFVSLHTPLSGAIPSSPAVF <b>S</b> PATIGQSR            | S131              |
| V <b>S</b> T <b>P</b> SVSSVFTPPVK                   | S249              |
| V <b>S</b> T <b>P</b> SVSSVFTPPVK                   | T250              |
| V <b>S</b> T <b>P</b> <b>S</b> VSSVFTPPVK           | S252              |
| V <b>S</b> T <b>P</b> <b>S</b> VSSVFT <b>T</b> PPVK | S252, T258        |
| V <b>S</b> T <b>P</b> SVSSVFT <b>T</b> PPVK         | T258              |
| <b>S</b> IRTPTQSVGT <b>P</b> R                      | S263              |
| SIR <b>T</b> PTQSVGT <b>P</b> R                     | T266              |
| SIRTPTQ <b>S</b> VG <b>T</b> PR                     | S270              |
| TPTQSVG <b>T</b> PR                                 | T273              |
| <b>T</b> PTSADYQVVSDKP <b>A</b> PR                  | T288              |
| <b>T</b> PT <b>S</b> ADYQVVSDKP <b>A</b> PR         | T288, S291        |

Phosphorylation sites mapped in XenopusNup53 (genebank accession JQ747515) after immunoprecipitation from mitotic or interphase Xenopus egg extracts. Phosphorylation sites are indicated in red. Position T100, T288 and S291 were phosphorylated on Nup53 isolated from mitotic, but not interphasic extracts.

**Table S2: DNA constructs used in this study**

| <b>Constructs</b>                       |
|-----------------------------------------|
| pET28a SUMO Nup53xl 1-166               |
| pET28a SUMO Nup53xl 1-267               |
| pET28a SUMO Nup53xl 1-312               |
| pET28a SUMO Nup53xl 1-312 S94E/T100E    |
| pET28a SUMO Nup53xl 1-312 R105E/K106E   |
| pET28a SUMO Nup53xl 1-319               |
| pET28a SUMO Nup53xl 1-319 S94E/T100E    |
| pET28a SUMO Nup53xl 1-319 R105E/K106E   |
| pET28a SUMO Nup53xl 1-320               |
| pET28a SUMO Nup53xl 1-320 S94E/T100E    |
| pET28a SUMO Nup53xl 1-320 R105E/K106E   |
| pET28a SUMO Nup53xl 1-320 F172E/W203E   |
| pET28a SUMO Nup53xl 93-267              |
| pET28a SUMO Nup53xl 93-267 S94A/T100A   |
| pET28a SUMO Nup53xl 93-267 S94E/T100E   |
| pET28a SUMO Nup53xl 93-267 R105E/K106E  |
| pET28a SUMO Nup53xl 93-267 F172E/W203E  |
| pET28a SUMO Nup53xl 93-312              |
| pET28a SUMO Nup53xl 93-319              |
| pET28a SUMO Nup53xl 93-320              |
| pET28a SUMO Nup53xl 93-320 S94E/T100E   |
| pET28a SUMO Nup53xl 93-320 R105E/K106E  |
| pET28a SUMO Nup53xl 93-320 F172E/W203E  |
| pET28a SUMO Nup53xl 107-267             |
| pET28a SUMO Nup53xl 130-267             |
| pET28a SUMO Nup53xl 130-312             |
| pET28a SUMO Nup53xl 130-319             |
| pET28a SUMO Nup53xl 130-320             |
| pET28a SUMO Nup53xl 130-320 F172E/W203E |
| pET28a SUMO Nup53xl 162-267             |
| pET28a SUMO Nup53xl 162-267 F172E/W203E |
| pET28a SUMO Nup53xl 162-312             |
| pET28a SUMO Nup53xl 162-320             |
| pET28a SUMO Nup53xl 254-320             |
| pET28a SUMO Nup59sc 1-528               |
| pET28a SUMO Nup53sc 1-475               |
| pET28a PP Nup133hs 30-514               |
| pET28a NusA Nup98xl 676-863             |
| pET28a GST Nup53xl 1-267                |
| pET28a GST Nup53xl 1-267 S94A/T100A     |
| pET28a GST Nup53xl 1-267 S94E/T100E     |
| pET28a GST Nup53xl 1-267 R105E/K106E    |
| pET28a GST Nup53xl 1-267 F172E/W203E    |
| pET28a GST Nup53xl 162-267              |
| pET28a GST Nup53xl 162-312              |
| pET28a GST Nup53xl 162-319              |
| pET28a GST Nup53xl 162-320              |
| pET28a GST Nup53xl 162-320 F172E/W203E  |
| pET28a GST Nup98xl 487-634              |

| <b>Constructs</b>           |
|-----------------------------|
| pSI HA Nup53xl              |
| pSI HA Nup53xl F172E/W203E  |
| pSI myc Nup53xl             |
| pSI myc Nup53xl F172E/W203E |

## Supplementary Methods

### Pulldown experiments

Fragments used for the GST pulldown experiments were cloned into a modified pET28a vector with GST tag followed by a recognition site for TEV protease and purified via the N-terminal His<sub>6</sub> tag. 60 µl GSH–Sepharose (GE Healthcare) were incubated with 300 µg of the respective bait proteins, washed and blocked with 5% BSA in PBS. Beads were incubated with cytosol from *Xenopus* egg extracts (diluted 1:1 with PBS, and cleared by centrifugation for 30 min at 100,000 rpm in a TLA110 rotor (Beckman Coulter) for 2 h and washed six times with PBS. Bound proteins were eluted by cleavage with TEV protease (0.5 mg/ml) for 1 h at RT and analyzed by SDS-PAGE and Western blotting. For detection of NDC1 and GP210, 5 mg of membranes from *Xenopus* egg extracts (Antonin et al, 2005) were solubilized in 5 ml 50 mM Phosphate buffer pH 7.4, 500 mM NaCl, 1% Triton X-100 and protease inhibitors (Roche), instead of cytosol and the first four washes with PBS were in the presence of 0.1% Triton X-100.

### Mass Spectrometry

2 ml interphasic (Hartl et al, 1994) or (CSF arrested) mitotic (Murray, 1991) *Xenopus* egg extracts were diluted with 1.2 ml wash buffer (10 mM HEPES, 50 mM KCl, 2.5 mM MgCl<sub>2</sub> pH 7.4), cleared by centrifugation for 10 min at 100,000 rpm in a TLA110 rotor and incubated with 50 µl Protein A Sepharose (GE Healthcare), to which affinity purified Nup53 antibodies were bound and crosslinked with 10 mM dimethylpimelimidate (Pierce). After 1h incubation the sepharose was washed 10 times with wash buffer. Proteins were eluted with SDS sample buffer (without DTT) and separated by SDS-PAGE. Gel sections from 30-45 kDa were excised and proteins were in-gel digested by trypsin. The resulting peptide mixtures were measured on an LTQ-Orbitrap XL and processed by MaxQuant software as described (Borchert et al, 2010). Multistage activation was enabled in all MS measurements.

### Generation of liposomes

A mixture of lipids resembling the ER/nuclear envelope composition (Franke et al, 1970) (60 mol % phosphatidylcholine, 19.8 mol % phosphatidylethanolamine, 10 mol % phosphatidylinositol, 5 mol % cholesterol, 2.5 mol % sphingomyelin, 2.5 mol % phosphatidylserine 0.2 mol % 18:1-12:0 NBD-PE all Avanti polar lipids) dissolved in chloroform were dried on a rotary evaporator and overnight under vacuum. PBS buffer was gently added to result in a final lipid concentration of 6 mg/ml. After 2 h of incubation at

37°C to allow spontaneous liposome formation the flask was agitated to dissolve residual lipids. After ten cycles of freeze/thawing liposomes were extruded as described before.

DNA sequence of *Xenopus laevis* Nup53 optimized for expression in *E. coli*

ATGATGGCAGCAGCATTTAGCATGGAACCGATGGGTGCAGAACCGATGGCACTG  
GGTAGCCCGACCAGCCCGAAACCGAGTGCCGGTGCACAGTTTCTGCCTGGTTTTTC  
TGCTGGGTGATATTCCGACACCGTTACACCGCAGCCTCGTCCGAGCCTGGGTAT  
TATGGAAGTTCGTAGTCCGCTGCATAGCGGTGGTAGTCCTCCGCAGCCGGTTCTG  
CCGACCCATAAAGATAAAAGCGGTGCACCTCCGGTTCGTAGCATTTATGATGATG  
TTGCAAGTCCGGGTCTGGGTAGCACACCGCGTAATACCCGTAAAATGGCAAGCTT  
TAGCGTTCTGCATACACCTCTGAGCGGTGCAATTCCGAGCAGTCCGGCAAGCAAT  
GTTTTTAGTCCGGCAACCATTGGTCAGAGCCGTAAAACCACCCTGAGTCCGGCAC  
AGATGGACCCGTTTTATACCCAGGGTGATGCACTGACCAGTGATGATCAGCTGGA  
TGATACCTGGGTACC GTTTTTGGTTTTCCGCAGGCAAGCGCAAGCTATATTCTGC  
TGCAGTTTGCACAGTATGGCAATATTATTAACATGTGATGAGCAATAATGGCAA  
TTGGATGCATATTCAGTATCAGAGCAAACCTGCAGGCACGTAAAGCACTGAGCAA  
AGATGGTCGTATTTTTGGTGAAAGCATTATGATTGGTGTGAAACCGTGCATTGAT  
AAAAGCGTTATGGAAGCAACCGAAAAAGTTAGCACCCCGAGCGTTAGCAGCGTT  
TTTACACCTCCGGTTAAAAGCATTCGTACCCCGACCCAGAGCGTTGGTACACCGC  
GTGCAGCAAGCATGCGTCCGCTGGCAGCAACCTATCGCACCCCGACCAGCGCAG  
ATTATCAGGTTGTTAGCGATAAACCGGCACCGCGTAAAGATGAAAGCATTGTTAG  
CAAAGCCATGGAATATATGTTTGGTTGGTGATAG

DNA sequence of *Saccharomyces cerevisiae* NUP53 optimized for expression in *E. coli*

ATGGCAGATCTGCAGAAACAAGAAAATTCAAGCCGTTTTACCAATGTTAGCGTTA  
TTGCACCGGAAAGCCAGGGTCAGCATGAACAGCAGAAACAGCAAGAACAACAA  
GAACAGCAGAAACAGCCGACAGGTCTGCTGAAAGGTCTGAATGGTTTTCCGAGC  
GCACCGCAGCCGCTGTTTATGGAAGATCCTCCGAGCACCGTTAGCGGTGAACTGA  
ATGATAATCCGGCATGGTTTAATAATCCGCGTAAACGTGCAATTCCGAATAGCAT  
TATTAACGTAGCAATGGTCAGAGCCTGAGTCCGGTTCGTAGCGATAGCGCAGAT  
GTTCCGGCATTTAGCAATAGCAATGGCTTTAATAATGTGACCTTTGGCAGCAAAA  
AAGATCCGCGTATTCTGAAAAATGTGAGCCCGAATGATAATAATAGCGCCAATA  
ATAATGCCCATAGCAGCGATCTGGGCACCGTTGTTTTTGATAGCAATGAAGCACC  
TCCGAAAACCAGCCTGGCAGATTGGCAGAAAGAAGATGGTATTTTTTAGCAGCAA  
AACCGATAATATTGAAGATCCGAATCTGAGCAGCAATATTACCTTTGATGGTAAA  
CCGACCGCAACCCCGAGCCCGTTTTCGTCCGCTGGAAAAAACCAGCCGTATTCTGA  
ATTTTTTTGATAAAAATACCAAACCACCCCGAATACCGCAAGCAGCGAAGCAA  
GCGCAGGTAGCAAAGAAGGTGCAAGCACCAATTGGGATGATCATGCCATTATTA  
TTTTTGGCTATCCGGAAACCATTGCCAATAGTATTATTTTTTCATTTTGCCAATTTTG  
GCGAAATTCTGGAAGATTTTCGCGTGATTAAAGATTTTAAAAAGCTGAACAGCAA  
AATAAAAGCAAAAGCCCGAGCCTGACCGCACAGAAATATCCGATTTATACCGG  
TGATGGTTGGGTAAACTGACCTATAAAAGCGAACTGAGCAAAAGCCGTGCACT  
GCAAGAAAATGGCATTATTATGAATGGCACCTGATTGGTTGCGTTAGCTATAGT  
CCGGCAGCACTGAAACAGCTGGCAAGCCTGAAAAAAGCGAAGAAATTATTAAT  
AATAAAACCAGCAGCCAGACCAGCCTGAGCAGCAAAGATCTGAGCAATTATCGT  
AAAACCGAAGGCATTTTTGAAAAAGCCAAAGCAAAAGCGGTGACCAGCAAAGTT  
CGTAATGCCGAATTTAAAGTGAGCAAAAATAGCACCAGCTTTAAAAATCCGCGTC  
GCCTGGAAATTAAGATGGTCGTAGCCTGTTTCTGCGTAATCGTGGTAAAATTCA  
TAGCGGTGTTCTGAGCAGCATTGAAAGCGATCTGAAAAACGTGAACAGGCAAG  
CAAAAGCAAAAAAAGCTGGCTGAATCGCCTGAATAATTGGCTGTTTGGTTGGAAT  
GATCTGTAGTGA

DNA sequence of *Saccharomyces cerevisiae* NUP59 optimized for expression in *E. coli*

ATGTTTGGTATTCGCAGCGGCAATAATAATGGTGGTTTTACCAATCTGACCAGCC  
AGGCACCGCAGACCACCCAGATGTTTCAGAGCCAGAGCCAGCTGCAGCCGCAGC  
CGCAGCCTCAACCGCAGCAGCAGCAACAGCATCTGCAGTTTAATGGTAGCAGTG  
ATGCAAGCAGCCTGCGTTTTGGTAATAGCCTGAGCAATACCGTGAATGCCAATAA  
TTATAGCAGCAATATTGGCAATAACAGCATCAACAATAATAACATCAAAAATGG  
CACCAATAACATTAGCCAGCATGGTCAGGGCAATAATCCGAGCTGGGTAAATAAT  
CCGAAAAACGTTTTACACCGCATAACCGTTATTCGTCGTAACCACCAAACAGA  
ATAGCAGCAGCGATATTAATCAGAATGATGATAGCAGCAGCATGAATGCAACCA  
TGCGTAATTTTAGCAAACAGAATCAGGATAGCAAACATAATGAACGCAATAAAA  
GCGCAGCCAATAATGATATTAATAGCCTGCTGAGCAACTTTAATGATATTCCTCC  
GAGCGTTACCCTGCAGGATTGGCAGCGTGAAGATGAATTTGGTAGCATTCCGAGC  
CTGACCACCCAGTTTGTACCATAAATATACCGCCAAAAAACCAATCGCAGCG  
CCTATGATAGCAAAAATACCCCGAATGTGTTTGATAAAGATAGCTATGTGCGCAT  
TGCCAATATTGAACAGAATCATCTGGATAATAATTATAATACCGCAGAAACCAAT  
AATAAAGTGCATGAAACCAGCAGCAAAAGCAGCAGCCTGAGCGCAATTATTGTT  
TTTGGTTATCCGGAAAGCATTAGCAATGAACTGATTGAACATTTTAGCCATTTTGG  
CCATATTATGGAAGATTTTCAGGTTCTGCGTCTGGGTCGTGGTATTAATCCGAATA  
CCTTTCGCATTTTTTCATAATCATGATACCGGCTGTGATGAAAATGATAGCACCGTG  
AATAAAAGCATTACCCTGAAAGGTCGCAATAATGAAAGTAATAACAAAAAATAT  
CCGATTTTACAGGCGAAAGCTGGGTAAACTGACCTATAATAGCCCGAGCAGCG  
CACTGCGTGCAGCAAGAAAATGGTACAATTTTTCGTGGTAGCCTGATTGGTTG  
TATTCCGTATAGCAAAAATGCCGTTGAACAGCTGGCAGGTTGCAAATGATAAT  
GTGGATGATATTGGCGAATTTAATGTGAGCATGTATCAGAATAGCAGTACCAGCA  
GCACCAGCAATACCCCGAGTCCTCCGAATGTTATTATTACCGATGGCACCCCTGCT  
GCGCGAAGATGATAATACACCGGCAGGTCATGCAGGCAATCCGACCAATATTAG  
CAGCCCGATTGTTGCAAATAGCCCGAATAAACGTCTGGATGTGATTGATGGTAAA  
CTGCCGTTTATGCAGAATGCAGGTCCGAATAGCAATATTCCGAATCTGCTGCGTA  
ATCTGGAAAGCAAAAATGCGTCAGCAAGAAGCAAAAATATCGTAATAATGAACCGG  
CAGGCTTACCATAAACTGAGCAATTGGCTGTTTGGTTGGAATGATCTGTAGTG

A



### Supplementary References

- Antonin W, Franz C, Haselmann U, Antony C, Mattaj JW (2005) The integral membrane nucleoporin pom121 functionally links nuclear pore complex assembly and nuclear envelope formation. *Molecular cell* **17**: 83-92
- Borchert N, Dieterich C, Krug K, Schutz W, Jung S, Nordheim A, Sommer RJ, Macek B (2010) Proteogenomics of *Pristionchus pacificus* reveals distinct proteome structure of nematode models. *Genome research* **20**: 837-846
- Franke WW, Deumling B, Baerbelermen, Jarasch ED, Kleinig H (1970) Nuclear membranes from mammalian liver. I. Isolation procedure and general characterization. *The Journal of cell biology* **46**: 379-395
- Hartl P, Olson E, Dang T, Forbes DJ (1994) Nuclear assembly with lambda DNA in fractionated *Xenopus* egg extracts: an unexpected role for glycogen in formation of a higher order chromatin intermediate. *The Journal of cell biology* **124**: 235-248
- Murray AW (1991) Cell cycle extracts. *Methods in cell biology* **36**: 581-605
- Schagger H, von Jagow G (1987) Tricine-sodium dodecyl sulfate-polyacrylamide gel electrophoresis for the separation of proteins in the range from 1 to 100 kDa. *Analytical biochemistry* **166**: 368-379
